1 **Article**

2 **Limits to the cellular control of sequestered cryptophyte prey in the**  
3 **marine ciliate *Mesodinium rubrum***

4

5 Andreas Altenburger<sup>1,2\*</sup>, Huimin Cai<sup>3\*</sup>, Qiye Li<sup>4\*</sup>, Kirstine Drumm<sup>5</sup>, Miran Kim<sup>5,6</sup>, Yuanzhen  
6 Zhu<sup>4</sup>, Lydia Garcia-Cuetos<sup>2</sup>, Xiaoyu Zhan<sup>4</sup>, Per Juel Hansen<sup>5</sup>, Uwe John<sup>7,8</sup>, Shuaicheng Li<sup>3‡</sup>,  
7 Nina Lundholm<sup>2‡</sup>

8

9 <sup>1</sup>The Arctic University Museum of Norway, UiT The Arctic University of Norway, 9037  
10 Tromsø, Norway

11 <sup>2</sup>Natural History Museum of Denmark, University of Copenhagen, 1350 Copenhagen,  
12 Denmark

13 <sup>3</sup>Department of Computer Science, City University of Hong Kong, Hong Kong 999077, China

14 <sup>4</sup>BGI-Shenzhen, Shenzhen 518083, China

15 <sup>5</sup>Department of Biology, University of Copenhagen, 3000 Helsingør, Denmark

16 <sup>6</sup>Research Institute for Basic Sciences, Chonnam National University, Gwangju 61186,  
17 Republic of Korea

18 <sup>7</sup>Alfred Wegener Institute, Helmholtz Centre for Polar and Marine Research, 27570  
19 Bremerhaven, Germany

20 <sup>8</sup>Helmholtz Institute for Functional Marine Biodiversity, 23129 Oldenburg, Germany

21 \*shared first authorship

22 ‡To whom correspondence may be addressed. Email: [shuaicli@cityu.edu.hk](mailto:shuaicli@cityu.edu.hk) or  
23 [nlundholm@snm.ku.dk](mailto:nlundholm@snm.ku.dk).

24

25

26 The authors declare no competing financial interests

## 27 **Abstract**

28 The marine ciliate *Mesodinium rubrum* is famous for its ability to acquire and exploit  
29 chloroplasts and other cell organelles from some cryptophyte algal species. We  
30 sequenced genomes and transcriptomes of free-swimming *Teleaulax amphioxeia*, as  
31 well as well-fed and starved *M. rubrum* in order to understand cellular processes upon  
32 sequestration under different prey and light conditions. From its prey, the ciliate  
33 acquires the ability to photosynthesize as well as the potential to metabolize several  
34 essential compounds including lysine, glycan, and vitamins that elucidate its specific  
35 prey dependency. *M. rubrum* does not express photosynthesis related genes itself, but  
36 elicits considerable transcriptional control of the acquired cryptophyte organelles. This  
37 control is limited as light dependent transcriptional changes found in free-swimming *T.*  
38 *amphioxeia* got lost after sequestration. We found strong transcriptional rewiring of the  
39 cryptophyte nucleus upon sequestration, where 35% of the *T. amphioxeia* genes were  
40 significantly differentially expressed within well-fed *M. rubrum*. Qualitatively, 68% of all  
41 genes expressed within well-fed *M. rubrum* originated from *T. amphioxeia*.  
42 Quantitatively, these genes contributed up to 48% to the global transcriptome in well-  
43 fed *M. rubrum* and down to 11% in starved *M. rubrum*. This tertiary endosymbiosis  
44 system functions for several weeks, when deprived of prey. After this point in time, the  
45 ciliate dies if not supplied with fresh prey cells. *M. rubrum* represents one evolutionary  
46 way of acquiring photosystems from its algal prey, and might represent a step on the  
47 evolutionary way towards a permanent tertiary endosymbiosis.

## 48 **Introduction**

49 Endosymbiotic events have enabled eukaryotes to photosynthesize. More than a  
50 billion years ago, during a primary endosymbiosis event, a photosynthesizing

51 cyanobacterium was retained by a non-plastidic unicellular eukaryote. Since then,  
52 chloroplasts have spread throughout the eukaryotic tree of life by secondary and  
53 tertiary endosymbiosis.

54 *Teleaulax amphioxeia* is an ecologically important, phototrophic marine unicellular  
55 eukaryote (protist) with a worldwide distribution (1). It is 8 – 11  $\mu\text{m}$  long and a member  
56 of the enigmatic group of cryptophytes, a group that is challenging to place in the  
57 evolutionary tree of life (2). Most cryptophytes have permanent chloroplasts,  
58 originating from a secondary endosymbiosis event between a red alga and a  
59 phylogenetically distinct, non-photosynthetic host (3, 4). Due to this origin, cryptophyte  
60 chloroplasts have a complex membrane topology with four membranes that enclose a  
61 nucleomorph between the outer two and the inner two membranes (5-7). The  
62 nucleomorph is a highly reduced remnant of the endosymbiotic red algal nucleus.  
63 Cryptophytes hence possess DNA of different origin: red algal nuclear DNA in the  
64 nucleomorph, chloroplast DNA, cryptophyte mitochondrial DNA, and cryptophyte  
65 nuclear DNA (8).

66 Being primary producers, phototrophic cryptophytes are at the base of the marine food  
67 web, and grazed upon by heterotrophic and mixotrophic protists alike (9). One of these  
68 grazers is *Mesodinium rubrum*, an abundant and ecologically important ciliate. *M.*  
69 *rubrum* is widely distributed in coastal ecosystems and known for causing non-toxic  
70 red tides (10-12). Acquisition of phototrophy by retaining a chloroplast that originated  
71 from a secondary endosymbiosis event is regarded as a tertiary endosymbiosis (13,  
72 14). *M. rubrum* preys on cryptophytes belonging to the genera *Geminigera*, *Teleaulax*  
73 and *Plagioselmis*. *M. rubrum* cells keep around 20 chloroplasts from its cryptophyte  
74 prey, and usually a single enlarged prey nucleus located close to the nuclei of the  
75 ciliate (ciliates have two macronuclei and one micronucleus) (15-17). In order to sustain

76 its maximum growth rate of ~0.5 per day, *M. rubrum* has to ingest ~one cryptophyte  
77 per day (18, 19). *M. rubrum* covers typically > 98% of its carbon need via  
78 photosynthesis at natural prey concentrations, and can replicate the acquired  
79 chloroplasts approximately four times after prey deprivation. Eventually, the  
80 chloroplasts are degraded, and *M. rubrum* dies unless new cryptophyte prey cells are  
81 ingested (18-21). Thus, this tertiary endosymbiosis between a cryptophyte and *M.*  
82 *rubrum* is not permanent and stable, but species-specific (22, 23).

83 The regulation of cryptophyte genes within *M. rubrum* has previously been studied  
84 using RNA-seq, or Expressed Sequence Tags and microarray approaches (24, 25).  
85 These studies found a remarkable cellular and metabolic chimerism between host and  
86 prey, and showed that *M. rubrum* not only sequesters the organelle machinery of its  
87 prey, but also the anabolic potential of the sequestered organelles (25). Most  
88 cryptophyte genes involved in photosynthesis were up-regulated after sequestration of  
89 the cryptophyte nucleus and chloroplasts into the ciliate (24). However, previous  
90 studies had the challenge to distinguish between transcripts originating from *M. rubrum*  
91 and transcripts originating from the prey cryptophytes. We used genomic DNA (gDNA)  
92 data from free-swimming *T. amphioxeia* and prey-starved *M. rubrum* to overcome this  
93 problem. By screening for *k*-mers shared between gDNA reads and transcripts, we  
94 were able to assign transcripts to the right species by sequence signature. Using this  
95 approach, we could follow the transcriptional changes upon sequestration for  
96 cryptophyte and ciliate genes separately. We investigated changes in the level of *T.*  
97 *amphioxeia* genes expressed before and after ingestion by *M. rubrum* and compared  
98 those with starved *M. rubrum* cells that had lost the prey nucleus (Fig. 1). We explored  
99 changes in the regulation of the sequestered cryptophyte nuclei in response to  
100 changing light and time conditions (night, morning and day) corresponding to darkness,

101 20 minutes after turning on the light, and full light, and focused for the first time on  
102 transcriptional changes of ciliate genes under different light conditions and prey  
103 availabilities.

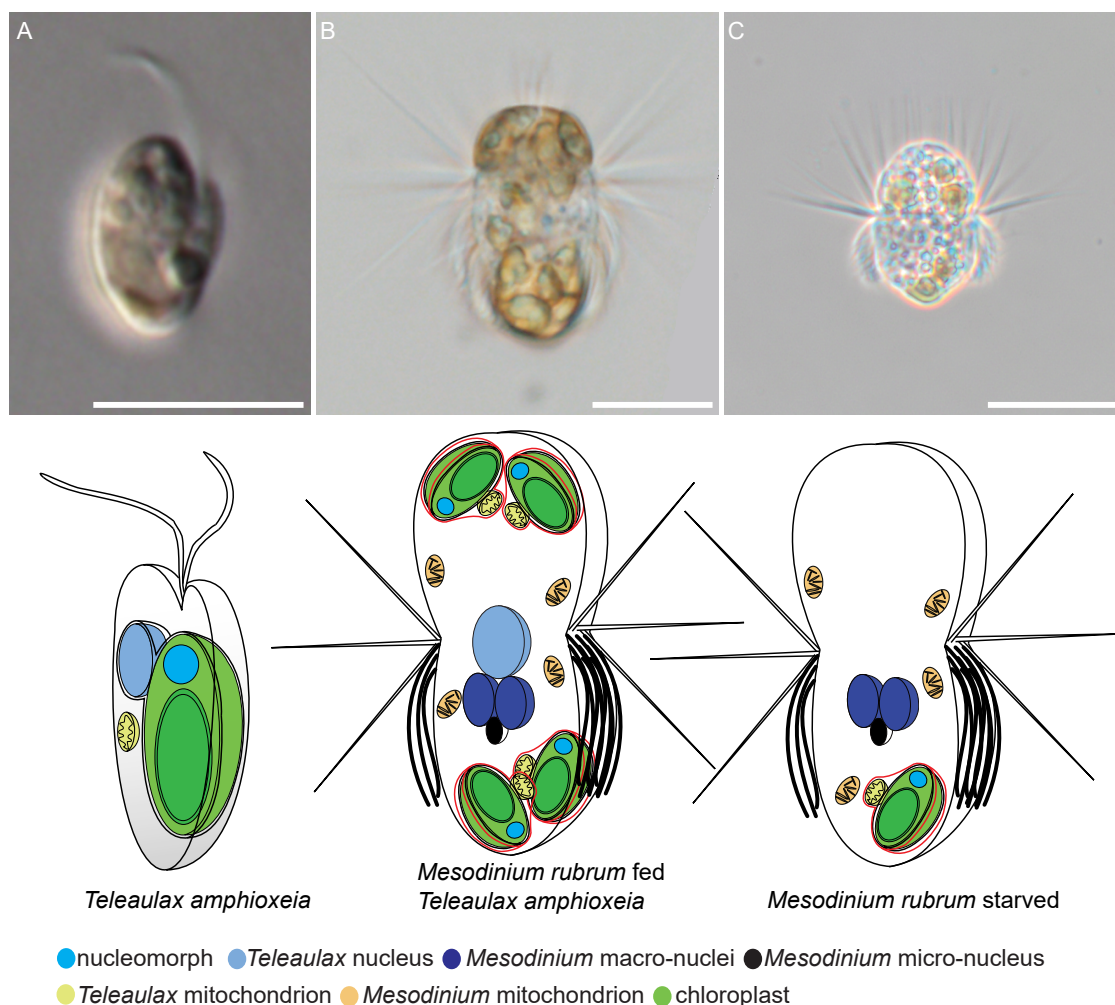

115 daughter cells receives the CPN, while in the other, one of the extra prey nuclei migrate close to the  
116 ciliate nuclei and enlarges (16). Scale bar equals 5  $\mu\text{m}$  in (A), and 10 $\mu\text{m}$  in (B) and (C).

117

## 118 **Results and Discussion**

### 119 **Transcriptomic profiles and reference gene set constructions for *Teleaulax*** 120 ***amphioxeia* and *Mesodinium rubrum***

121 We performed RNA-seq on cultures of free-swimming *T. amphioxeia*, *M. rubrum* well-  
122 fed, and *M. rubrum* prey-starved for more than 4 weeks (i.e. more than 90% of the cells  
123 in the *M. rubrum* culture had lost the central cryptophyte nucleus) (Fig. 1). Each culture  
124 was sampled at three time points during the light dark cycle: night (6 hours after the  
125 light was switched off), morning (20 minutes after the light was switched on), and day  
126 (7 hours after the light was switched on) (Fig. 2A). Biological triplicates were collected  
127 for each condition, and an average of 184 million reads were generated for each  
128 biological replicate (Supplementary Table 1). To accurately discriminate the species-  
129 origin of each assembled transcript, we also performed genome sequencing for DNA  
130 extracted from free-swimming *T. amphioxeia* and starved *M. rubrum*, respectively (Fig.  
131 2A; Supplementary Table 1).

132 As no reference nuclear genomes were available for *T. amphioxeia* and *M. rubrum*, we  
133 *de novo* assembled the transcriptome of each sample separately in a first step,  
134 followed by stepwise combining the transcripts assembled from each sample. The  
135 species identity of each transcript was determined by screening the *k*-mers shared  
136 between gDNA reads and transcript sequences (Fig. 2B; Supplementary Table 2; see  
137 methods for details). This allowed us to identify 72,061 and 22,250 non-redundant  
138 transcripts (i.e. genes) as *T. amphioxeia*- and *M. rubrum*-origin, respectively (Fig. 2C).  
139 To access the representativeness of the reference gene sets, we aligned the RNA-seq  
140 reads from free-swimming *T. amphioxeia* samples to the 72,061 *T. amphioxeia* genes,  
141 and aligned the reads from *M. rubrum* samples to the collection of 72,061 *T.*  
142 *amphioxeia* and 22,250 *M. rubrum* genes (Note: *M. rubrum* samples transcribed genes

143 from both the host and prey genomes). On average, 97.7% of the reads (ranging 96.2%  
144 - 98.6%) could be mapped back to the reference gene sets, 95.7% (ranging 93.1% -  
145 97.2%) were aligned in proper pairs, and 88.0% (ranging 84.9% - 89.6%) had mapping  
146 quality  $\geq 30$  (Supplementary Table 3), demonstrating that most sequences in the  
147 transcriptomes are present uniquely in the two reference gene sets. We also aligned  
148 the RNA-seq reads from free-swimming *T. amphioxeia* samples to the collection of *T.*  
149 *amphioxeia* and *M. rubrum* genes, and observed less than 0.02% of the aligned reads  
150 being mistakenly mapped to *M. rubrum* genes, highlighting the reliability of our DNA-  
151 based species assignment process.

152 We annotated 62.9% of *T. amphioxeia* and 50.6% of *M. rubrum* genes by searching  
153 against different functional databases (Fig. 2C). Interestingly, the GC content of *T.*  
154 *amphioxeia* genes was around 59%, thus considerably higher than the GC content of  
155 *M. rubrum* with 35% (Fig. 2C; Fig. 2D). This GC deviation further supports that the  
156 genes were assigned to the right species.

157



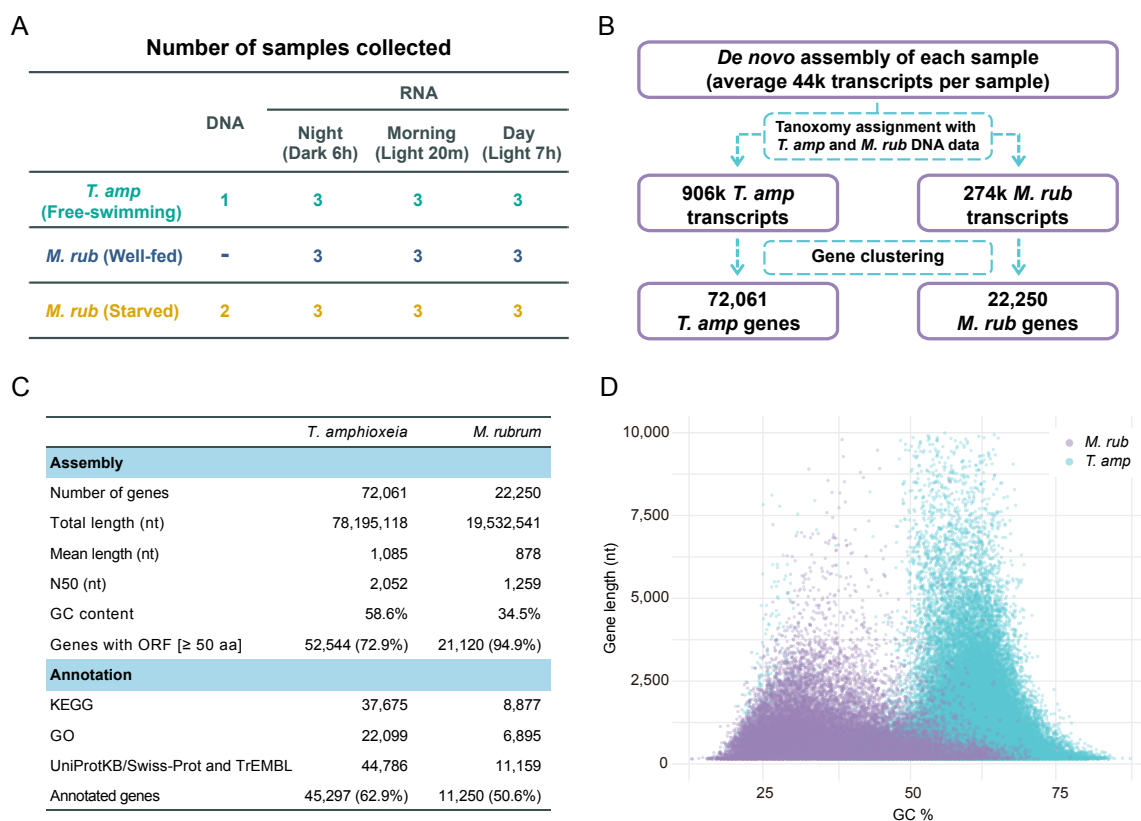

158

159 **Fig 2.** Workflow and transcriptome features of *Teleaulax amphioxeia* and *Mesodinium rubrum*. (A)  
 160 Sampling strategy. (B) Analysis workflow. (C) Summary of the non-redundant reference gene sets  
 161 constructed from the *de novo* transcriptome assembly. Abbreviations: nt, nucleotides; aa, amino acids;  
 162 ORF, open reading frame; KEGG: Kyoto Encyclopedia of Genes and Genomes; GO: Gene Ontology.  
 163 (D). comparison of gene length and GC content for *M. rubrum* and *T. amphioxeia* genes respectively.

164

165

166 ***M. rubrum* keeps all the genetic material and transcribes most genes from the**  
 167 **acquired cryptophyte nuclei**

168 By searching for the *T. amphioxeia* genes in the *M. rubrum* gDNA sequence reads, we  
 169 retrieved almost all (97.3% - 99.9%) of the 72,061 *T. amphioxeia* genes in the two  
 170 starved *M. rubrum* DNA samples (Fig. 3A; see methods), suggesting that *M. rubrum*  
 171 keeps all the genetic material from the acquired cryptophyte nuclei. Next, we examined  
 172 the transcriptional activity of the *T. amphioxeia* nuclei upon sequestration by *M.*

173 *rubrum*. Gene expression measurement indicated that on average 63% of the *T.*  
174 *amphioxeia* genes were actively transcribed (TPM  $\geq 1$ ) inside *M. rubrum* at some time-  
175 point during the sampling cycle, which comprised 82% of the *T. amphioxeia* genes,  
176 when considering all sampling points together (Fig. 3B). Even though these ratios were  
177 lower than those observed in the free-swimming *T. amphioxeia* samples (77% in  
178 average and 96% in combination), they did indicate that the majority of *T. amphioxeia*  
179 genes (82%) were actively transcribed inside the *M. rubrum* cells (Fig. 3B). At the same  
180 time, an average of 90% of the *M. rubrum* genes were actively transcribed regardless  
181 of light and prey availability (Supplementary Fig. S1).

182 Up to  $68.4 \pm 1.2\%$  of the genes transcribed within the well-fed *M. rubrum* cells  
183 originated from *T. amphioxeia*. This proportion was maintained at  $50.4 \pm 1.3\%$  for the  
184 starved *M. rubrum* samples (Fig. 3C). The contribution of cryptophyte genes to the  
185 global transcriptome of well-fed *M. rubrum* in the present study ( $68.4 \pm 1.2\%$ ), is higher  
186 than previous estimates (13.5% in (24), 58-62% in (25)). However, when taking the  
187 transcriptional abundance of each gene into account, the contribution of *T. amphioxeia*  
188 transcripts to the global *M. rubrum* transcriptomes was much lower, ranging from  $47.5$   
189  $\pm 1.3\%$  (well fed morning) to  $10.2 \pm 0.9\%$  (starved night) (Fig. 3D). Thus, despite the  
190 fact that most *T. amphioxeia* genes were transcribed inside *M. rubrum*, the gene  
191 products from *M. rubrum* dominated the mRNA pools of the host cells even in well-fed  
192 cells. In a well-integrated endosymbiotic system, one would expect to find a lower  
193 qualitative expression of endosymbiont genes: only genes that are beneficial to the  
194 host will be expressed, while genes not needed by the host will suffer depletion. Given  
195 that 82% of all *T. amphioxeia* genes were expressed at some time point within *M.*  
196 *rubrum*, it is likely that many of the *T. amphioxeia* transcripts are not photosynthesis  
197 related and rather by-products. Their functional benefit for *M. rubrum* is not obvious.

198

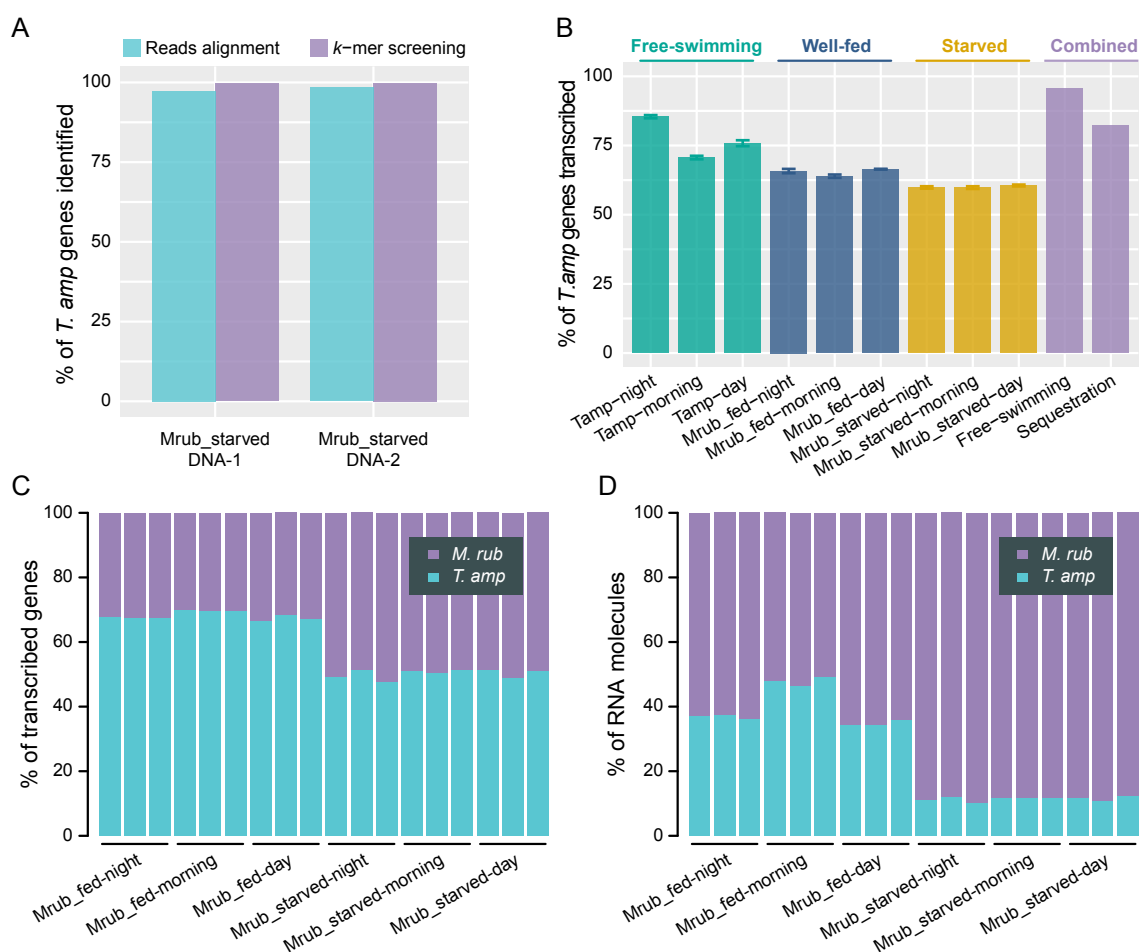

199

200 **Fig. 3.** Global transcriptome features of *M. rubrum* (A) percentage of *T. amphioxeia* genes identified in  
 201 the starved *M. rubrum* DNA data by read alignment and *k*-mer screening methods. (B) proportion of  
 202 actively transcribed *T. amphioxeia* genes before and after sequestration. (C) global transcriptome of *M.*  
 203 *rubrum* with proportion of contributing *T. amphioxeia* and *M. rubrum* genes. (D) global transcriptome of  
 204 *M. rubrum* with proportion of transcript abundance originating from *T. amphioxeia* or *M. rubrum*.

205

206 **Cryptophyte nuclei present dramatic transcriptional rewiring upon**  
 207 **sequestration**

208 Principal component analysis (PCA) with the *T. amphioxeia* gene expression matrix  
 209 separated all the 27 samples into three distinct clusters of free-swimming *T.*  
 210 *amphioxeia*, well-fed *M. rubrum* and prey-starved *M. rubrum* (Fig. 4A), with the

211 distance separating free-swimming *T. amphioxeia* samples from all *M. rubrum* samples  
212 being larger than the distance separating well-fed and starved *M. rubrum* groups. This  
213 suggests that the condition of sequestration alone induced an overwhelming amount  
214 of transcriptional changes when compared with other experimental conditions for the  
215 *T. amphioxeia* genes. Consistently, this was supported also by weighted gene  
216 correlation network analyses (WGCNA) using the same matrix after filtration for lowly  
217 expressed genes (44,241 *T. amphioxeia* genes with mean normalized count  $\geq 10$ )  
218 identified six modules. The first two modules comprised 81% of the input genes and  
219 enriched *T. amphioxeia* genes that were prevalingly down- and up-regulated after  
220 sequestration by *M. rubrum*, respectively (Supplementary Fig. S2). More specifically,  
221 differential gene expression analyses between the three sample groups revealed by  
222 PCA showed that 34.8% and 31.9% of *T. amphioxeia* genes were significantly  
223 differentially expressed ( $|\log_2FC| > 1.5$  and  $FDR < 0.01$ ) upon sequestration in well-fed  
224 and prey-starved *M. rubrum*, respectively (Fig. 4B). All these results consistently  
225 emphasize that a profound transcriptional rewiring occurs in the *T. amphioxeia* nuclei  
226 after sequestration by *M. rubrum*, as reported previously (24, 25).

227 Functional enrichment analyses for the sequestration-induced differentially expressed  
228 genes (DEGs) revealed that *T. amphioxeia* genes related to ion transmembrane  
229 transport, signal transduction, cell motility, and regulation of metabolic processes were  
230 down-regulated. On the other hand, up-regulation after sequestration was observed  
231 for genes involved in photosynthesis, RNA processing, DNA replication and repair, lipid  
232 and protein metabolism, and metabolism of diverse compounds (e.g. nucleic acid,  
233 carbohydrate, amino acid, carboxylic acid and pigment) (Fig. 4C, Supplementary Table  
234 6, Supplementary Table 7). These results were generally consistent with previous  
235 observations by Kim *et al.* (24) and Lasek-Nesselquist *et al.* (25). Interestingly, we also

236 found that the up-regulated DEGs were enriched in DNA replication, repair and  
237 recombination, and cell cycle. These comprised *T. amphioxeia* genes encoding cyclins  
238 (e.g. CycA, CycH), cyclin-dependent kinases (e.g. CDK2, CDK7), cell division control  
239 proteins (e.g. Cdc6, Cdc7, Cdc45) and almost all the genes involved in the eukaryotic  
240 replication complex (Fig. 4D, Supplementary Fig. S3). This suggests that the  
241 sequestered nuclei are able to replicate their DNA. Besides, in contrast to Lasek-  
242 Nesselquist *et al.* (25), we did not observe downregulation of genes involved in protein  
243 processing pathways (Supplementary Fig. S4). On the contrary, many genes involved  
244 in endoplasmic reticulum membrane and mRNA surveillance pathway were up-  
245 regulated after sequestration (Supplementary Fig. S4 and S5). This implies that the  
246 sequestered prey nuclei play an active regulatory role in transcription, translation and  
247 also in transportation of *T. amphioxeia* gene products.

248 Of note, only few *T. amphioxeia* genes (927) were identified as DEGs between well-  
249 fed and prey-starved *M. rubrum* samples (Fig. 4B), and the majority of DEGs were  
250 shared between free-swimming-vs-inside well-fed *M. rubrum* and free-swimming-vs-  
251 inside starved *M. rubrum* (supplementary Fig. S6). This demonstrates that the global  
252 transcriptional patterns of the *T. amphioxeia* nuclei inside well-fed *M. rubrum* cells were  
253 highly similar with those inside starved *M. rubrum* cells.

254 These findings are unexpected as most of the starved cells had lost their prey nuclei;  
255 less than 10% of the starved *M. rubrum* cells had preserved the enlarged centered  
256 prey nucleus (CPN). A typical well-fed *M. rubrum* cell has about 20 chloroplasts and a  
257 single enlarged CPN, that is located at more or less the same position anterior to the  
258 two macronuclei within *M. rubrum* (16). With each chloroplast, *M. rubrum* takes up one  
259 cryptophyte nucleus. Well-fed *M. rubrum* cells can contain multiple prey nuclei, i.e. the  
260 CPN and some extra prey nuclei that are kept in the periphery of the cell (16). The

261 finding that well-fed and starved cells have similar gene expression patterns, suggests  
262 that only the CPN is actively transcribed inside *M. rubrum*. Otherwise, the multiple  
263 periphery nuclei have to perform a somehow concerted gene transcription with the  
264 CPN inside well-fed *M. rubrum* cells.

265 Experimental evidence suggests that chloroplasts can divide within *M. rubrum* without  
266 the presence of cryptophyte nuclei (16, 18). It is also known that photosynthesis in *M.*  
267 *rubrum* is related to the percentage of cells with a CPN, not to the number of  
268 chloroplasts (16). Starved *M. rubrum* cells that have lost the CPN, will usually have  
269 some chloroplasts remaining in the cell. A reason why those chloroplasts can survive  
270 within *M. rubrum* might be that they are particularly robust, with a comparatively large  
271 gene set (26, 27). Likely, the nucleomorph plays a crucial role in enabling the *T.*  
272 *amphioxeia* chloroplasts to divide within *M. rubrum* and renders it a favored prey in  
273 comparison to chloroplasts with smaller gene sets (28).

274

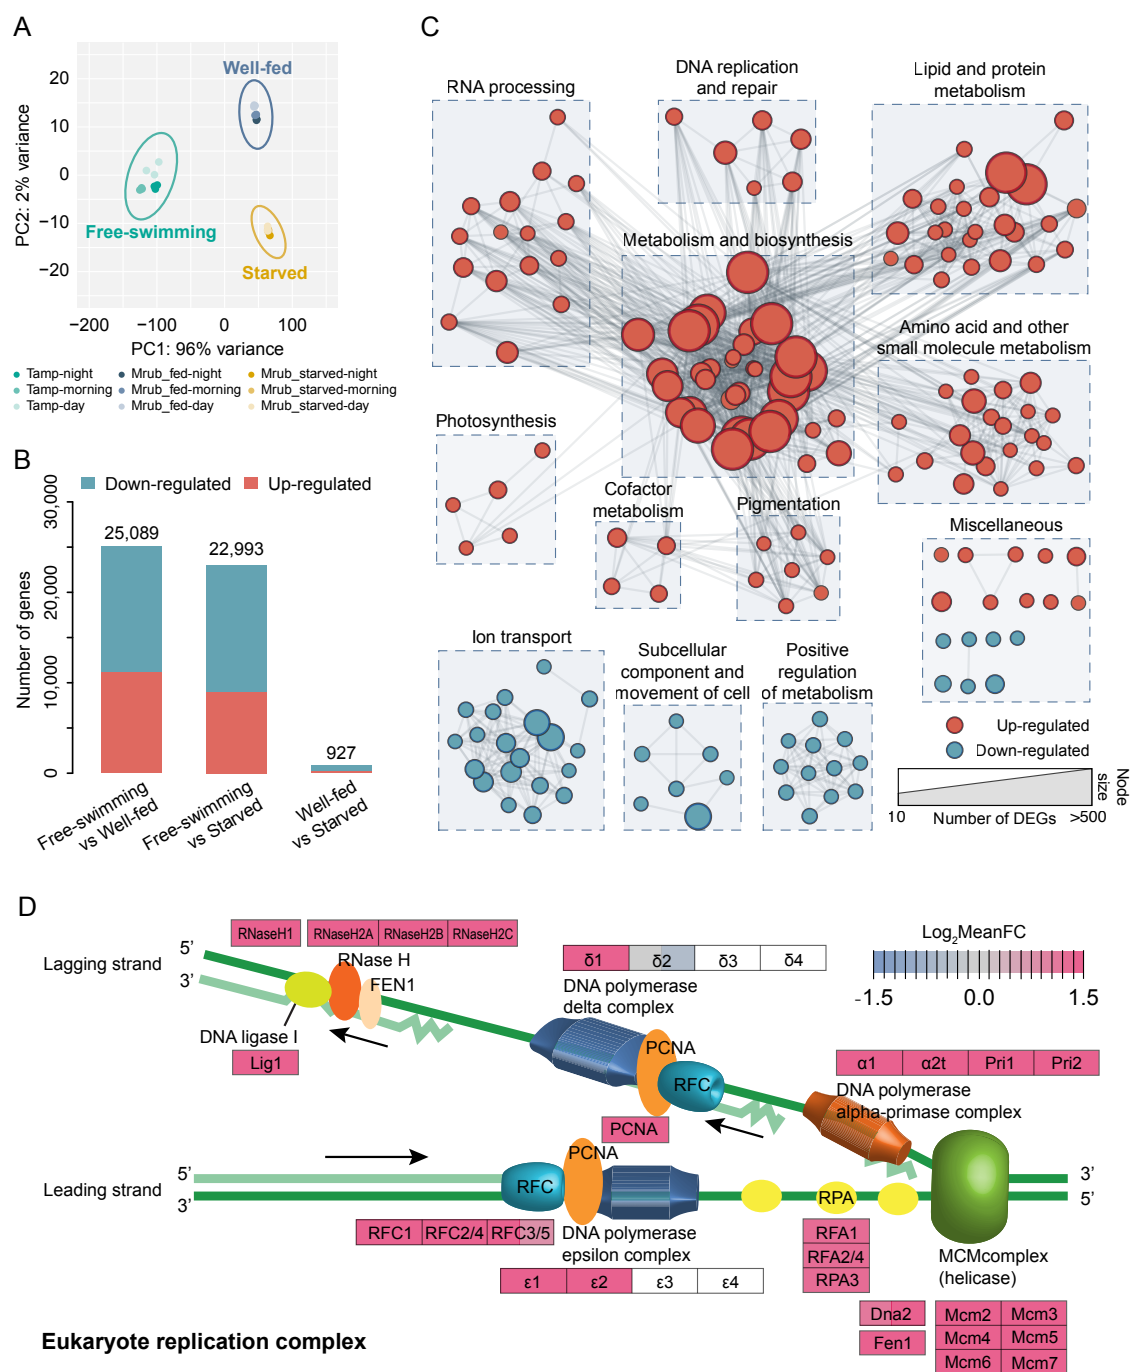

275

276 **Fig. 4.** Changes in gene expression of *Teleaulax amphioxeia* genes in response to sequestration. (A)  
 277 principal component analysis of *T. amphioxeia* genes show a clear segregation between free-swimming,  
 278 well-fed, and starved samples. (B) amount of significantly differentially expressed genes ( $|\log_2FC| > 1.5$   
 279 and  $FDR < 0.01$ ) upon sequestration. (C) GO enrichment results for *T. amphioxeia* genes up-/down-  
 280 regulated after sequestration in well-fed samples visualized as an enrichment map. Nodes represent  
 281 enriched gene-sets and edges represent mutual overlap between gene-sets, thus clustering highly  
 282 redundant gene-sets. (D) changes in *T. amphioxeia* gene expression in the eukaryote replication

283 complex pathway. Left part of each box shows  $\log_2$  fold change in gene expression for free-swimming  
284 vs. well-fed samples. Right part of each box shows  $\log_2$  fold change in gene expression for free-  
285 swimming vs. starved samples.

## 286 **Cryptophyte responses to light- and time-changes get lost upon sequestration** 287 **by *M. rubrum***

288 Free-swimming *T. amphioxeia* is expected to adjust its gene expression pattern  
289 according to light and time changes during night, morning and day as any other  
290 photosynthetic organism with permanent chloroplasts. This was confirmed by the PCA  
291 result (Fig. 4A). To get a closer look at the light- and time-dependent transcriptional  
292 responses of the cryptophyte genes before and after sequestration, we conducted  
293 pairwise correlation analyses of the free-swimming *T. amphioxeia* samples and the *M.*  
294 *rubrum* samples, respectively. While relatively low correlations were observed among  
295 *T. amphioxeia* samples from different light and time conditions (Fig. 5A), we found all  
296 the *M. rubrum* samples showing consistently high pairwise correlations (Fig. 5B),  
297 implying that the cryptophyte nuclei had lost the ability to adjust gene expression  
298 according to light and time changes upon sequestration. This conclusion is further  
299 confirmed by the overwhelming amount of dark/light-responding DEGs (10,828;  
300  $|\log_2FC| > 1.5$  and  $FDR < 0.01$ ) identified in free-swimming *T. amphioxeia* samples in  
301 comparison to those identified in *M. rubrum* samples (157; Fig. 5C).

302 *T. amphioxeia* genes, significant differentially expressed according to light and time  
303 changes, were functionally enriched in photosynthesis, oxidative phosphorylation,  
304 glycolysis and circadian entrainment related pathways (Supplementary Table 8),  
305 consistent with the expectation for a free-living photosynthetic organism. Of note, *T.*  
306 *amphioxeia* genes involved in circadian entrainment were generally down-regulated  
307 upon sequestration (Supplementary Table 7). This might partly account for the loss of  
308 time/light response of the cryptophyte nuclei upon sequestration. The expression of



309 many genes in free-swimming *T. amphioxeia* responded to light (i.e. DEGs up-  
310 regulated in morning and day versus night). After sequestration, these light responding  
311 genes maintained high expression levels at night. Including DEGs encoding for light-  
312 harvesting complex and light reaction of photosynthesis, which are responsible for  
313 harvesting and transferring light energy and obviously not needed at night (Fig. 5D,  
314 Supplementary Table 9). The loss of the dark/light response together with the over-  
315 expression of potentially undesired genes strongly suggests that *M. rubrum* can elicit  
316 only one expression pattern out of its acquired cryptophyte nucleus regardless of light  
317 condition and prey availability (i.e. the number of acquired prey nuclei).

318 Interestingly, in a different system, the Antarctic Ross Sea dinoflagellate acquires  
319 transient chloroplasts from haptophyte prey, and the expression of kleptoplast-targeted  
320 genes is also unaffected by environmental parameters such as light (29).

321 During evolution, foreign chloroplasts have ended up in other protists in many different  
322 ways (13). In some protists, intact endosymbionts are well integrated into host cells  
323 (30). Other protists reduce ingested algal cells, and keep prey nuclei as well as other  
324 cell organelles beside the chloroplasts (like *M. rubrum*). Yet, other protists retain  
325 exclusively the chloroplasts for shorter, (i.e. the ciliate *Strombidium*) or longer time (i.e.  
326 the dinoflagellate *Dinophysis*) (31, 32). This can be interpreted as evolutionary steps  
327 towards permanent endosymbiosis. In a first step, a prey cell is taken up by a host and  
328 not digested. In a second step, the host gets some control over the gene expression  
329 of the acquired cell via the ingested prey nuclei – that is where *M. rubrum* is right now.  
330 In a third step, only the chloroplasts are retained, but need to be replaced with time (ie.  
331 *Dinophysis* (33)). In the final step, the genes from the host and the acquired cell (or  
332 organelles such as chloroplasts and nuclei) need to align in order to fine-tune the gene  
333 expression according to environmental conditions. Whether or not *M. rubrum* is on its

334 way towards a permanent tertiary endosymbiosis is speculative. Such a step will  
 335 depend on the ability of *M. rubrum* to divide and keep the sequestered prey nuclei  
 336 permanently, or rely on gene transfer from the algal prey to the ciliate nuclei.  
 337

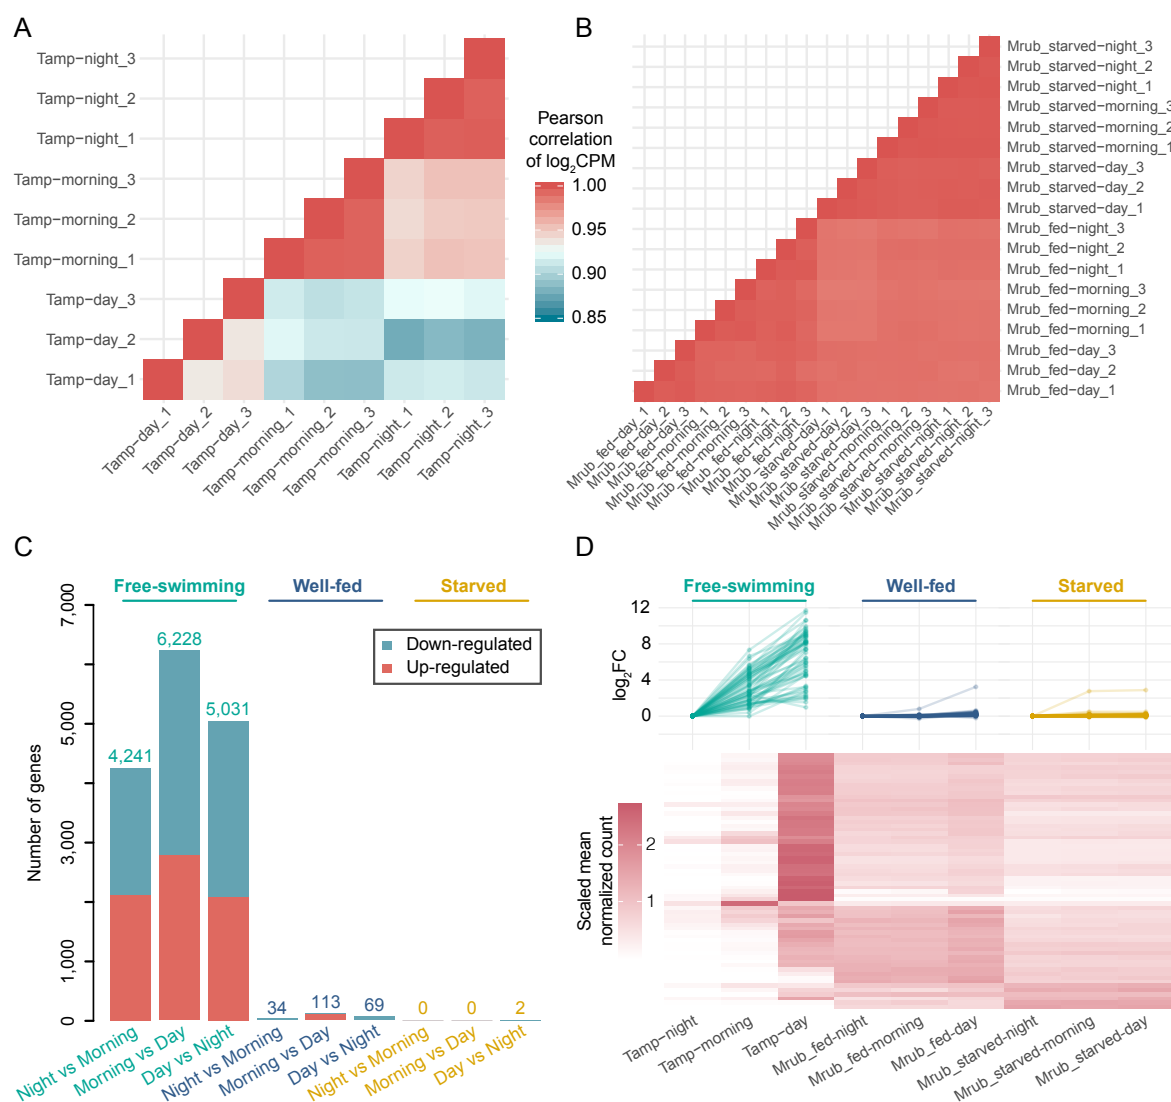

338  
 339 **Fig. 5.** Changes in light and time controlled gene expression of free-swimming *T. amphioxeia* and after  
 340 sequestration by *M. rubrum*. (A) Pearson correlation analysis of *T. amphioxeia* genes among different  
 341 samples show differences according to time and light condition. (B) Pearson correlation analysis of *T.*  
 342 *amphioxeia* genes after sequestration by *M. rubrum* reveals an expression pattern that is independent  
 343 of light and prey availability. (C) amount of *T. amphioxeia* genes that were differentially expressed  
 344 according to time and light condition in free-swimming cells and after sequestration by *M. rubrum*. (D)

345 small panels show expression fold change of light dependent *T. amphioxeia* DEGs at night, night-  
346 versus-morning, and night-versus-day in free-swimming, inside well-fed *M. rubrum* and inside starved  
347 *M. rubrum* condition. The heat map shows *T. amphioxeia* genes that got differentially expressed  
348 according to time and light condition before sequestration by *M. rubrum* but maintained at high  
349 expression levels at night after sequestration.

350

351 ***M. rubrum* fine-tunes gene expression in response to prey availability and up-**  
352 **regulates genes involved in transport when well fed**

353 The problem that *M. rubrum* faces is that it has to deal with different genetic codes.  
354 Ciliates show deviations in the genetic code and it has been suggested that these  
355 deviations have occurred multiple times independently (34). *M. rubrum* uses a genetic  
356 code that is different from cryptophytes and other eukaryotes, for instance it translates  
357 UAA and UAG into tyrosine and not into STOP codons (35). By retaining organelles  
358 from its cryptophyte prey, *M. rubrum* can use the prey nucleus to serve the chloroplast  
359 gene products using the standard code. Given this is possible for several cryptophytes  
360 such as *Teleaulax amphioxeia*, *T. acuta* and *Geminigera cryophila* (TPG clade), the  
361 question remains as to why only these taxa and no other cryptophytes apparently can  
362 be exploited (15). *M. rubrum* is known to feed on cryptophyte species belonging to  
363 different clades, but cannot utilize them for growth and photosynthesis, with the  
364 exception of the TPG clade (15, 36).

365 The construction of reference gene sets separately for *M. rubrum* and *T. amphioxeia*  
366 allowed us to compare the gene compositions of the host and its prey in this  
367 endosymbiotic system. By mapping the *M. rubrum* and *T. amphioxeia* genes to KEGG  
368 pathways, we found that the majority of pathways were present in both species,  
369 whereas *M. rubrum* lacked genes involved in photosynthesis, antenna proteins for  
370 photosynthesis and carotenoid biosynthesis (Fig. 6A), although we could not

371 completely rule out the possibility that these genes were presented in the *M. rubrum*  
372 genome but not expressed. Interestingly, we also found that the pathways related to  
373 the biosynthesis or metabolism of some essential compounds such as lysine, glycan  
374 and several kinds of vitamins (pantothenate, riboflavin and biotin) were absent or non-  
375 expressed in *M. rubrum* (Fig. 6A), indicating that *M. rubrum* has to obtain the metabolic  
376 potential for these compounds from the prey. This explains its dependency on grazing.  
377 Of note, most of these *M. rubrum*-absent pathways were actually up-regulated in *T.*  
378 *amphioxeia* after sequestration (Fig. 6A), implicating that *M. rubrum* is able to obtain  
379 these nutrients from its cryptophyte prey without digesting the acquired organelles,  
380 which is a critical step towards a permanent endosymbiosis. It can be speculated that,  
381 in addition to the nucleomorph of the chloroplast, these micronutrients are the reason  
382 why *M. rubrum* sequesters exclusively species of the TPG clade.

383 Next, we investigated the transcriptional changes of *M. rubrum* genes in response to  
384 different light conditions and prey availability (well-fed or prey-starved). PCA with the  
385 *M. rubrum* gene expression matrix revealed that the *M. rubrum* samples were clustered  
386 according to light condition as well as according to prey availability (Fig. 6B). The  
387 response to the supply of prey was stronger than the response to light (Fig. 6B). This  
388 finding was confirmed by a WGCNA analysis, which uncovered 10 co-expression  
389 modules. The two largest modules comprised up to 35% of the input genes and  
390 enriched *M. rubrum* genes that were prevalingly down- and up-regulated after  
391 starvation (Supplementary Fig. S7). However, DEG analyses using the same cutoff as  
392 the *T. amphioxeia* genes ( $|\log_2FC| > 1.5$  and  $FDR < 0.01$ ), or even lower cutoff ( $|\log_2FC|$   
393  $> 1$  and  $FDR < 0.01$ ), only identified a small number of genes as DEGs between well-  
394 fed and prey-starved *M. rubrum* samples (Fig. 6C). Actually, the negligible number of  
395 DEGs identified between samples from different light conditions suggests that *M.*

396 *rubrum* is not sensitive to light changes, and that the few responses to light take  
397 comparatively long time (Fig. 6B, C).

398 To uncover the functional preference of *M. rubrum* genes in response to prey  
399 availability, we conducted functional enrichment analysis for genes clustered in the two  
400 largest co-expression modules of the WGCNA analysis. Module 1 comprised 3,285  
401 genes that got downregulated upon prey starvation (Supplementary Fig. S7). Module  
402 2 contained 2,387 *M. rubrum* genes that got upregulated upon starvation  
403 (Supplementary Fig. S7). Genes downregulated upon prey starvation (upregulated in  
404 well-fed condition) were enriched in small molecule metabolism, ribonucleoside  
405 metabolism and transmembrane transport (Fig. 6D). Interestingly, genes related to  
406 active transmembrane transporter activity (GO:0022804; adjusted  $p = 0.001$ ) were  
407 enriched in module 1 (Supplementary Table 10). This indicates that *M. rubrum*-derived  
408 active transmembrane transporters play an important role in well-fed *M. rubrum* (Fig.  
409 6E). In contrast, passive transmembrane transporter activity is more prominent in prey-  
410 starved *M. rubrum* (Fig. 6E), indicating that well-fed *M. rubrum* is transporting  
411 molecules among different cell compartments and actively coordinating biological  
412 processes of itself and the cryptophyte prey within the cell.

413

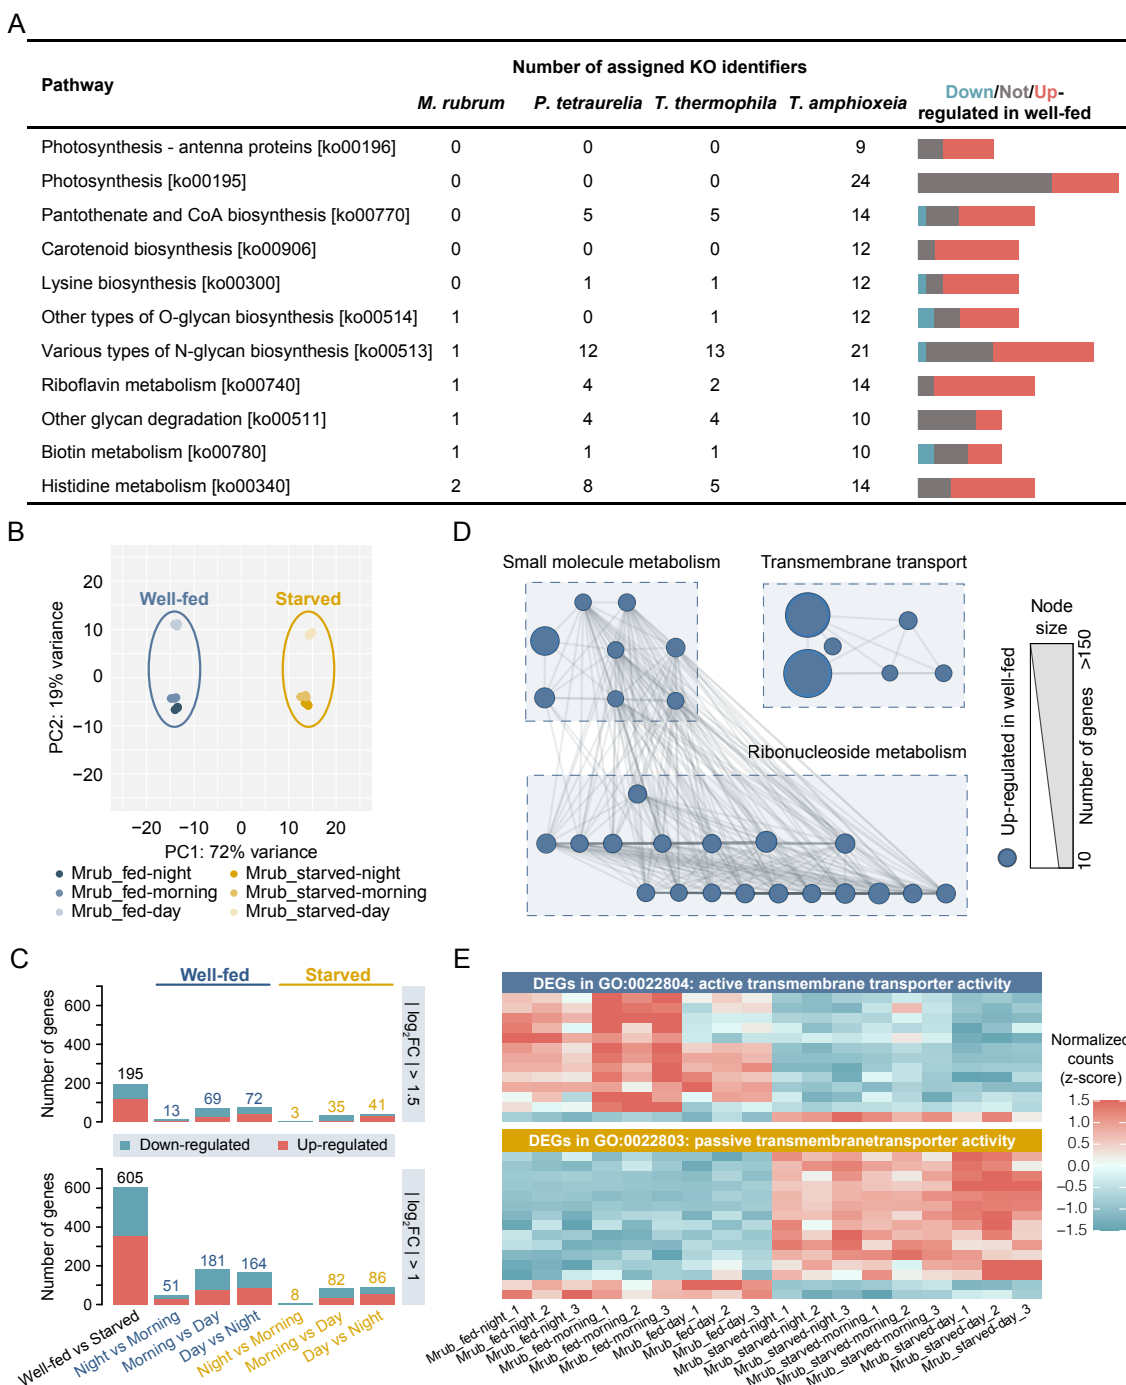

414

415 **Fig. 6.** Transcriptional changes in *M. rubrum* upon sequestration in different light conditions. (A)  
 416 comparison of the presence of genes from selected pathways in the ciliates *M. rubrum*, *Paramecium*  
 417 *tetraurelia*, and *Tetrahymena thermophile* and the cryptophyte *T. amphioxeia* with differential expression  
 418 of *T. amphioxeia* genes upon sequestration (free-swimming versus well-fed), showing services provided  
 419 by *T. amphioxeia* to *M. rubrum*. (B) principal component analysis of *M. rubrum* genes. (C) barplot  
 420 showing the amount of significantly differentially expressed *M. rubrum* genes ( $|\log_2FC| > 1.5$  or  $|\log_2FC|$   
 421  $> 1$ ) according to prey vs and light conditions. (D) GO enrichment analysis of *M. rubrum* genes upregulated

422 in the well-fed samples visualized as an enrichment map. (E) heat map showing the differential  
423 expression (up/down fold change > 1.5) of active and passive transmembrane transporters in well-fed  
424 and starved *M. rubrum* cells.

425

## 426 **Conclusions**

427 We found very strong transcriptional changes of *T. amphioxeia* genes after  
428 sequestration by *M. rubrum*. Upregulated prey genes were related to photosynthesis  
429 and metabolism, as well as biosynthesis of lysine and glycan, several kinds of vitamins  
430 and gene replication. These processes provide a gain for the host, *M. rubrum* and  
431 demonstrates its prey dependency. Light dependent transcriptional regulation of *T.*  
432 *amphioxeia* genes found in free-swimming condition got lost upon sequestration. The  
433 transcriptional pattern of *T. amphioxeia* genes in well-fed and prey-starved *M. rubrum*  
434 was highly similar, indicating that *M. rubrum* can only induce the expression of one  
435 particular pattern out of the acquired prey nucleus. *M. rubrum* shows only very few  
436 adjustments in its gene expression in response to different light conditions. Noticeable  
437 is the upregulation of active transmembrane transporters in well-fed *M. rubrum* and the  
438 role of passive transmembrane transporters in starved *M. rubrum*.

439

## 440 **Materials and Methods**

### 441 **Cultures**

442 Cultures were established from single-cell isolates of *Teleaulax amphioxeia* (SCCAP  
443 K-1837, collected in Elsinore Harbor, Denmark), and *Mesodinium rubrum* (MBL-  
444 DK2009 collected in September 2009 in Elsinore Harbor, Denmark). Cultures (*T.*  
445 *amphioxeia*, *M. rubrum* fed *T. amphioxeia*) were kept in triplicates and grown in glass

446 bottles in F/2 medium at 15 °C in a light/dark cycle of 16/8h with a light intensity of 100  
447  $\mu\text{mol photons m}^{-2}\text{s}^{-1}$ . During the exponential phase of growth, the ciliates were  
448 transferred to new media when cell concentrations reached 5000  $\text{ml}^{-1}$  or more.

#### 449 **RNA extraction**

450 For RNA extraction, cultures were harvested in full light (7 hours into the light cycle),  
451 in darkness (6 hours into dark cycle) and in the transition between dark and light (20  
452 minutes into the light cycle). Cells of *M. rubrum* were harvested in a well-fed and a  
453 starved stage.

454 For the well-fed condition, we checked before extraction that no free cryptophyte cells  
455 remained in the medium and that at least 90% of all *M. rubrum* cells contained a  
456 cryptophyte nucleus. This was done by staining the nuclei with Hoechst reagent  
457 (#33342, Thermo Fisher Scientific, Waltham, USA), and checking 20 stained cells  
458 under a fluorescent microscope. Harvesting of starved cells was done approximately  
459 four weeks after the last cryptophytes had been seen in the culture. We confirmed the  
460 loss of cryptophyte nuclei by staining with Hoechst reagent and checking for prey nuclei  
461 under a fluorescence microscope. Cells were harvested after at least 90% of all *M.*  
462 *rubrum* cells had lost their cryptophyte nucleus. Cells were harvested by centrifugation  
463 in 10ml glass tubes at 3220 rcf for 10 minutes (see Supplementary Table 11 for cell  
464 numbers in each harvest). Pellets were transferred to 1.5 mL LoBind Eppendorf tubes  
465 and liquid nitrogen was directly added onto the pellets. The Eppendorf tubes were  
466 stored on ice without allowing the pellets to thaw until the lysis buffer was added. RNA  
467 was extracted using the column based Exiqon Cell and Plant RNA Isolation Kit  
468 (#300110, Exiqon, Vedbæk, Denmark) following the 'plant' protocol. In addition, a  
469 separate round of harvest has been transferred to hot Trizol and stored at -80 °C as  
470 backup. Two samples (10 and 11) from this backup have been used for RNA extraction



471 using the Trizol method. Extracted RNA was stored at -80 °C until library preparation  
472 for sequencing.

### 473 **DNA extraction**

474 For DNA extraction *T. amphioxeia* cells as well as starved *M. rubrum* (fed *T. acuta*)  
475 cells were harvested as described above and DNA extracted using a KingFisher Duo  
476 Prime System (#5400110, Thermo Fisher Scientific, Waltham, USA) using the Plant  
477 DNA Kit and following the manufacturers recommendations.

### 478 **Library construction and sequencing**

479 The RNA-seq libraries were mainly prepared using the MGIEasy RNA Library Prep Set  
480 (V1.0, MGI Tech) with 1 ug total RNA as input and sequenced on the BGISEQ-500RS  
481 platform using the PE100 chemistry according to the standard protocols provided by  
482 MGI Tech Co., Ltd (Shenzhen, China). The only exception was one of the three  
483 biological replicates of Tamp-day, of which the amount of total RNA was less than 1  
484 ug and failed to meet the requirement of the MGI kit. The RNA-seq library of this sample  
485 was prepared using the TruSeq Stranded mRNA LT Sample Prep kit (RS-122-2101,  
486 Illumina) with 500 ng total RNA as input, and sequenced on the Illumina HiSeq 4000  
487 platform using the PE100 chemistry, according to the standard Illumina protocols (San  
488 Diego, CA, USA).

489 The DNA sequencing libraries of free-swimming *T. amphioxeia* and starved *M. rubrum*  
490 were prepared using the MGIEasy DNA Library Prep Kit (V1.1, MGI Tech) with 1 µg  
491 genomic DNA as input, and sequenced on the BGISEQ-500RS platform using the  
492 PE100 chemistry according to the standard protocols provided by MGI Tech Co., Ltd  
493 (Shenzhen, China).

### 494 **Quality control of raw sequencing data**

495 Prior to subsequent analyses, all the DNA- and RNA-seq raw reads were passed to  
496 SOAPnuke (v1.5.3) (37) for quality control by removal of adapter-contaminated reads  
497 and low-quality reads. Specifically, all the DNA-seq data were filtered by SOAPnuke  
498 with parameters *-n 0.02 -l 20 -q 0.3 -Q 2 -G -d*. For the RNA-seq data, we generated  
499 two versions of clean data. The first one was used for de novo transcriptome assembly  
500 and generated by parameters *-n 0.02 -l 20 -q 0.3 -p 1 -t 15,0,15,0 -Q 2 -G -d* (i.e.  
501 removing adapter-contaminated, low-quality and duplicated reads). The second  
502 version was used for gene expression measurement and generated by parameters *-n*  
503 *0.02 -l 20 -q 0.3 -p 1 -t 15,0,15,0 -Q 2 -G* (i.e. removing adapter-contaminated and low-  
504 quality reads but keeping duplicated reads).

#### 505 **Construction of reference gene sets for *T. amphioxeia* and *M. rubrum***

506 A hierarchical strategy was employed to construct the reference gene sets for *T.*  
507 *amphioxeia* and *M. rubrum* with the RNA-seq and DNA-seq clean data.

##### 508 (i) De novo transcriptome assembly for each RNA sample

509 The clean RNA reads (without duplicates) of each sample were first assembled using  
510 Trinity (v2.4.0) (38, 39) with parameters *--min\_contig\_length 150 --min\_kmer\_cov 2 --*  
511 *min\_glue 3*. Then the highly similar sequences were clustered, and the redundant  
512 transcripts were removed from each transcriptome assembly using cd-hit-est (v4.6.8)  
513 (40, 41) with a sequence identity threshold of 0.95. Finally, the clean RNA reads (with  
514 duplicates) were aligned to each assembly to quantify the abundance of each gene  
515 defined by Trinity (i.e. a transcript cluster) using Salmon (v0.13.1) (42) with parameters  
516 *--validateMappings -l IU --allowDovetail*. The lowly expressed genes with TPM < 1 were  
517 removed from each transcriptome assembly, then only the longest transcript of each  
518 gene was kept. Detailed statistics for the transcriptome assembly for each RNA sample  
519 is available in Supplementary Table 2.

520 (ii) Assignment of transcripts to *T. amphioxeia* and *M. rubrum*

521 Species assignment was conducted based on the average nucleotide identity (ANI) of  
522 each transcript in relative to the DNA sequences of *T. amphioxeia* and *M. rubrum*  
523 estimated by Mash (v2.1) (43, 44). To eliminate potential prokaryotic contamination in  
524 the transcriptomes, we also built a data set containing 10,243,458 prokaryotic  
525 nucleotide sequences by extracting all Archaea and Bacteria sequences from the NCBI  
526 nt database (release 20190315). Specifically, we sketched at most 5,000 non-  
527 redundant 21-mers from each transcript, and compared them with the non-redundant  
528 21-mers generated from all of the *T. amphioxeia* DNA reads, *M. rubrum* DNA reads  
529 and the prokaryotic nucleotide sequences, respectively, to estimate ANI of *T.*  
530 *amphioxeia* ( $ANI_{\text{tamp}}$ ), *M. rubrum* ( $ANI_{\text{mrub}}$ ) and prokaryotic ( $ANI_{\text{prok}}$ ) for each transcript.  
531 Of note, even so, more than 90% of the cells in the starved *M. rubrum* cultures had lost  
532 the cryptophyte nucleus, genomic sequences of *T. amphioxeia* was still detectable in  
533 the starved *M. rubrum* DNA reads (although occurring at low abundances).  
534 Considering this, a transcript was assigned to: (1) *T. amphioxeia* if  $ANI_{\text{tamp}} \geq 0.95$  and  
535  $ANI_{\text{prok}} < 0.95$ ; (2) *M. rubrum* if  $ANI_{\text{tamp}} < 0.95$ ,  $ANI_{\text{mrub}} \geq 0.95$  and  $ANI_{\text{prok}} < 0.95$ ; (3)  
536 unknown sequences for other conditions (Supplementary Table 2). The unknown  
537 sequences were discarded from subsequent analyses.

538 (iii) Hierarchical removal of redundant transcripts

539 The reference gene sets of *T. amphioxeia* and *M. rubrum* were generated by combining  
540 *T. amphioxeia* and *M. rubrum* transcripts from all the samples, respectively. The highly  
541 similar sequences were clustered, and the redundant transcripts for the same species  
542 were removed using cd-hit-est (v4.6.8) (40, 41) with a sequence identity threshold of  
543 0.95. To further remove redundant transcripts that failed to be clustered by cd-hit-est  
544 (caused by alternative splicing such as exon skipping, intron retention, etc.), two

545 rounds of Minimap2 spliced alignment and MCL clustering processes were performed.  
546 Specifically, pairwise spliced alignment for all transcripts was generated using the all-  
547 vs-all mode of Minimap2 (v2.10-r764) (45) with parameters *-aX -x splice*. Then, a graph  
548 was built with the best alignment of each query that satisfied identity > 0.95 and  
549 coverage > 70% against the shorter sequence. The vertices of the graph were the  
550 transcripts and the edges were weighted by identity x coverage. Next, the graph was  
551 inputted to Markov Clustering algorithm (mcl v14-137) (46) to cluster similar sequences  
552 with the default power and inflation setting, and the longest transcript of each cluster  
553 was kept as the representative. The Minimap-MCL process ran iteratively based on  
554 the cluster representatives generated by the last iteration until no more pairwise  
555 alignments satisfying the threshold were found. Then a second round of the Minimap-  
556 MCL process was performed with the threshold identity > 0.98 and coverage of the  
557 shorter sequence > 50% to generate the final non-redundant *T. amphioxeia* and *M.*  
558 *rubrum* reference gene sets. The longest ORF for each gene was detected by  
559 TransDecoder (v5.5.0) (39) with parameters *-m 50 --genetic\_code universal* for the *T.*  
560 *amphioxeia* genes and *-m 50 --genetic\_code Mesodinium* for the *M. rubrum* genes.

561 (iv) Estimation of the representativeness of the reference gene sets

562 To evaluate the representativeness of the reference gene sets, we aligned the RNA  
563 clean reads (with duplicates) from each of the *T. amphioxeia* samples to the *T.*  
564 *amphioxeia* genes, and aligned the reads from each of the *M. rubrum* samples to the  
565 collection of *T. amphioxeia* and *M. rubrum* genes using BWA-MEM (v0.7.16) (47) with  
566 default parameters. Then, the numbers and ratios of reads being aligned, being  
567 uniquely aligned (as defined by mapping quality  $\geq 30$ ), and being aligned in proper  
568 pairs, in relative to the total numbers of inputted reads, were counted by samtools  
569 flagstat (SAMtools v1.7) (48, 49). The completeness of the gene sets was assessed

570 by the Benchmarking Universal Single-Copy Orthologs (BUSCO v3) (50) with the  
571 eukaryota odb9 database (Supplementary Table 12).

## 572 **Identification of *T. amphioxeia* genes present in prey-starved *M. rubrum* DNA** 573 **data**

574 To determine whether the whole prey nuclei were kept inside *M. rubrum* (Fig. 3A), DNA  
575 read alignment and alignment-free k-mer screening methods were used to identify *T.*  
576 *amphioxeia* genes in the two starved *M. rubrum* DNA samples. For the alignment-  
577 based method, we aligned the DNA reads of the two starved *M. rubrum* DNA samples  
578 to the *T. amphioxeia* gene set using BWA-MEM (v0.7.16) (47) and calculate the  
579 coverage of each gene using genomeCoverageBed (v2.26.0) (51) with default  
580 parameters. *T. amphioxeia* genes with coverage larger than 70% were considered  
581 present in the starved *M. rubrum* cells. The alignment-free k-mer screening method  
582 was described in the above section “Assignment of transcripts to *T. amphioxeia* and  
583 *M. rubrum*”. The *T. amphioxeia* genes present in the starved *M. rubrum* DNA samples  
584 were defined as  $ANI_{\text{tamp}} \geq 0.95$  and  $ANI_{\text{prok}} < 0.95$ .

## 585 **Expression level quantification**

586 We aligned the RNA clean reads of each sample to the database containing all *T.*  
587 *amphioxeia* and *M. rubrum* genes and quantified the abundance of each gene using  
588 Salmon (v0.13.1) (42) with parameters `--validateMappings -l IU --allowDovetail`. Of  
589 note, more than 99.98% of the aligned reads from the free-swimming *T. amphioxeia*  
590 samples were mapped to the *T. amphioxeia* genes by Salmon, highlighting the  
591 reliability of our species assignment process described above. To eliminate the big  
592 disparity in the data amount originated from *T. amphioxeia* across different sample  
593 groups (Fig. 3D) for subsequent analyses, we downsampled the clean data of each  
594 sample to adjust the number of *T. amphioxeia* aligned reads in each sample to at most

595 ~40M. The raw counts of the *T. amphioxeia* genes in all the 27 samples were collected  
596 (Supplementary Table 4). Then, we balanced the data amount originated from *M.*  
597 *rubrum* across all *M. rubrum* samples in the same way and generated the raw counts  
598 of the *M. rubrum* genes in all the 18 *M. rubrum* samples (Supplementary Table 4).

### 599 **Transcriptome features of *M. rubrum***

600 With the conclusion that *M. rubrum* keeps all the genetic material from the prey (Fig.  
601 3A), we further investigated how actively the *T. amphioxeia* genes were transcribed in  
602 the *M. rubrum* samples (Fig. 3B) and the component features of the global *M. rubrum*  
603 transcriptomes (Fig. 3C and 3D). Specifically, three matrices were first collected from  
604 the Salmon quantification output: EffectiveLength of each *T. amphioxeia* gene in each  
605 sample, Counts of each *T. amphioxeia* gene in each sample and TPM of each *T.*  
606 *amphioxeia* and *M. rubrum* gene in each *M. rubrum* sample. Next, the *T. amphioxeia*  
607 TPM matrix were then re-calculated with the EffectiveLength and Counts matrices  
608 according to formula:  $TPM_i = 10^6 * (Counts_i / EffectiveLength_i) / [\sum (Counts_i /$   
609  $EffectiveLength_i)]$ . The genes with  $TPM \geq 1$  were deemed to be actively transcribed.  
610 Finally, we calculated the proportion of actively transcribed *T. amphioxeia* genes in all  
611 samples with the re-calculated *T. amphioxeia* TPM matrix, the ratio of actively  
612 transcribed *T. amphioxeia* and *M. rubrum* gene numbers (  
613  $NumGenes_{Tamp} / (NumGenes_{Tamp} + NumGenes_{Mrub})$  vs.  
614  $NumGenes_{Mrub} / (NumGenes_{Tamp} + NumGenes_{Mrub})$ ) and accumulated the abundance  
615 of actively transcribed *T. amphioxeia* and *M. rubrum* genes ( $\sum TPM_{Tamp} / (\sum TPM_{Tamp} +$   
616  $\sum TPM_{Mrub})$  vs.  $\sum TPM_{Mrub} / (\sum TPM_{Tamp} + \sum TPM_{Mrub})$ ) in each *M. rubrum* sample with  
617 the *T. amphioxeia* and *M. rubrum* TPM matrix. The proportion of actively transcribed  
618 *M. rubrum* genes at different prey availabilities (Fig. S1) was counted in the same  
619 manner as Fig. 3B.

## 620 **Identification of differentially expressed genes (DEGs)**

621 The DEG candidates between sample groups were detected by DESeq2 (v1.22.0)  
622 (52). First, the library sizes across samples were normalized using the default median  
623 ratio method, taking the raw counts as input. Next, to obtain dispersion estimates, the  
624 type of fitting of dispersions to the mean intensity was set to be parametric. Then, we  
625 used Wald significance tests (nbinomWaldTest) for model fitting and test statistics. The  
626 Benjamini-Hochberg False Discovery Rate (FDR) was employed to adjust p-value for  
627 multiple test correction. Finally, the significant DEGs were defined with the criteria of  
628 basemean  $\geq 20$ , adjusted p-value  $< 0.01$  and  $|\log_2(\text{fold change})| > 1.5$  ( $|\log_2(\text{fold}$   
629  $\text{change})| > 1.5$  and  $|\log_2(\text{fold change})| > 1$  were both used to detect significant *M.*  
630 *rubrum* DEGs).

## 631 **Principal component analysis (PCA) clustering**

632 We used the normalized counts as described in the above DEG section to perform  
633 PCA clustering. We filtered the gene counts with narrow variance (standard deviation  
634 of normalized count  $< 10$  across all samples) and then vst (variance stabilizing  
635 transformation provided by DESeq2) transformed the normalized counts with  
636 parameter *blind=FALSE*. Finally, we generated the PCA plots with the vst transformed  
637 matrices using plotPCA function provided by DESeq2.

## 638 **Identification of co-expression modules**

639 Co-expression network analyses were performed using the weighted gene correlation  
640 network analyses R package (WGCNA v1.68) (53). After filtering lowly expressed  
641 genes (mean normalized count  $< 10$  across all samples), the normalized read count  
642 matrices were vst transformed with parameter *blind=FALSE*. Then the vst transformed  
643 matrices were passed to the blockwiseModules function implemented in the WGCNA

644 package for identification of the signed co-expression modules with parameters  
645 *maxBlockSize = 50000*, *networkType = signed*, *minModuleSize = 100*, *minKMEtoStay*  
646 *= 0.6*, *minCoreKME = 0.5*, *mergeCutHeight = 0.15*, *numericLabels = TRUE*,  
647 *pamRespectsDendro = FALSE* and *power = 16* for the *T. amphioxeia* genes and *power*  
648 *= 18* for the *M. rubrum* genes.

## 649 **Functional annotation and enrichment analysis**

650 We aligned the gene sequences to the UniProtKB/Swiss-Prot database (release  
651 20190408) with BLASTX (blast-2.2.26) using parameters *-F F -e 1e-5*. The best hit of  
652 each query was retained based on the BLASTX bit score. The GO annotation of the  
653 best aligned UniProt protein was then assigned to the query gene. To determine what  
654 pathways the genes might be involved in, gene sequences were searched against the  
655 KEGG database (v89.1)(54) with BLASTX (blast-2.2.26) using parameters *-F F -e 1e-*  
656 *5*. The best hit of each query was retained based on the BLASTX bit score.

657 A set of better quality and reliable functional annotations was generated (the BLASTX  
658 hits with e-value lower than  $1e-10$ ) for the functional enrichment analyses.  
659 Hypergeometric tests were employed to examine whether a list of DEGs was enriched  
660 in a specific GO term in relation to background genes as previously described(55), by  
661 comparing the number of target DEGs annotated to this GO term, the number of target  
662 DEGs not annotated to this GO term, the number of background genes (i.e. all the *T.*  
663 *amphioxeia* or *M. rubrum* genes excluding the target DEGs) annotated to this GO term,  
664 and the number of background genes not annotated to this GO term. P-values were  
665 adjusted for multiple testing by applying FDR (56), and enriched GO terms were  
666 considered significant for adjusted p-value  $< 0.05$ . The GO enrichment results were  
667 visualized with EnrichmentMap (v3.2.1) (57) in Cytoscape (v3.7.2) (58).



668 KEGG enrichment analysis was done using the same principle as the GO enrichment.  
669 The regulation of gene expression involved in the enriched KEGG pathways was  
670 visualized Pathview (v1.23.3)(59).

### 671 **Comparison of the presence of genes involved in the pathways in the ciliates** 672 **and the cryptophyte**

673 To compare the biological process compositions of the host *M. rubrum* and its prey *T.*  
674 *amphioxeia* in this endosymbiotic system, we first extracted and counted the KO  
675 (KEGG Ontology) terms and pathways present in the reference ciliates *Paramecium*  
676 *tetraurelia* and *Tetrahymena thermophile* directly from the KEGG database (v89.1).  
677 For the host *M. rubrum* and its prey *T. amphioxeia*, we aligned the gene sequences to  
678 the KEGG database (v89.1) with BLASTX (blast-2.2.26) using three sets of  
679 parameters: (a)  $-F F -e 1e-5$ , (b)  $-F F -e 1e-10$  and (c)  $-F F -e 1e-20$ . The KO terms  
680 associated with the pathways of the best aligned KEGG protein were then assigned to  
681 the query genes. The pathways involving less than 5 genes with BLASTX hits (e-value  
682  $< 1e-5$ ) in *M. rubrum* and at least 20 genes with BLASTX hits (e-value  $< 1e-20$ ) in *T.*  
683 *amphioxeia* were considered absent or non-expressed in the host *M. rubrum* and  
684 provided by the prey *T. amphioxeia* in the endosymbiotic system. The number of  
685 present KO terms in the selected pathways in *M. rubrum* and *T. amphioxeia* shown in  
686 Fig. 6A were counted with the BLASTX hits (e-value  $< 1e-10$ ).

### 687 **Data availability**

688 The raw sequencing reads produced in this study are deposited in the CNGB  
689 Nucleotide Sequence Archive (CNSA) with accession number CNP0000925  
690 (<https://db.cngb.org/cnsa/>). The nucleotide sequences and functional annotations of  
691 the reference gene sets for *Teleaulax amphioxeia* and *Mesodinium rubrum* are  
692 deposited in the figshare repository.

## 693 **Acknowledgements**

694 The Danish Council for Independent Research funded this project (grant number 4181-  
695 00484 to PJH). QL acknowledges the Major scientific and technological projects of  
696 Hainan Province (ZDKJ2019011). LGC was supported by the Carlsberg Foundation  
697 (2012\_01\_0515).

## 698 **Author contributions**

699 PJH, NL, UJ and AA conceived the work. AA, KD, MK, LGC did the culturing; AA and  
700 LGC extracted RNA; QL, YZ and XZ did the sequencing; HC, AA and QL analyzed the  
701 data under the supervision of SL and NL; AA, HC and QL drafted the manuscript. All  
702 authors contributed to writing of the final version of the manuscript.

## 703 **Conflict of Interest**

704 The authors declare no conflict of interest.

705

## 706 **References**

707

- 708 1. J. I. Kim *et al.*, The Plastid Genome of the Cryptomonad *Teleaulax amphioxeia*. *PLoS One* **10**,  
709 e0129284 (2015).
- 710 2. F. Burki *et al.*, Untangling the early diversification of eukaryotes: a phylogenomic study of the  
711 evolutionary origins of Centrohelida, Haptophyta and Cryptista. *Proc. R. Soc. B* **283** (2016).
- 712 3. T. Cavalier-Smith, Membrane heredity and early chloroplast evolution. *Trends Plant Sci.* **5**,  
713 174-182 (2000).
- 714 4. S. E. Douglas, C. A. Murphy, D. F. Spencer, M. W. Gray, Cryptomonad algae are evolutionary  
715 chimaeras of two phylogenetically distinct unicellular eukaryotes. *Nature* **350**, 148-151  
716 (1991).
- 717 5. T. Cavalier-Smith, Principles of protein and lipid targeting in secondary symbiogenesis:  
718 euglenoid, dinoflagellate, and sporozoan plastid origins and the eukaryote family tree. *J.*  
719 *Eukaryot. Microbiol.* **46**, 347-366 (1999).
- 720 6. B. A. Curtis *et al.*, Algal genomes reveal evolutionary mosaicism and the fate of  
721 nucleomorphs. *Nature* **492**, 59-65 (2012).

- 722 7. S. Douglas *et al.*, The highly reduced genome of an enslaved algal nucleus. *Nature* **410**, 1091-  
723 1096 (2001).
- 724 8. K. Hoef-Emden, J. M. Archibald, "Cryptophyta (Cryptomonads)" in Handbook of the Protists,  
725 J. M. Archibald, A. G. B. Simpson, C. H. Slamovits, Eds. (Springer International Publishing,  
726 Cham, 2017), 10.1007/978-3-319-28149-0\_35 chap. 24, pp. 851-891.
- 727 9. B. A. Ward, M. J. Follows, Marine mixotrophy increases trophic transfer efficiency, mean  
728 organism size, and vertical carbon flux. *Proc. Natl. Acad. Sci. U.S.A.* **113**, 2958-2963 (2016).
- 729 10. L. Herfort, T. D. Peterson, V. Campbell, S. Futrell, P. Zuber, *Myrionecta rubra* (*Mesodinium*  
730 *rubrum*) bloom initiation in the Columbia River estuary. *Estuar. Coast. Shelf Sci.* **95**, 440-446  
731 (2011).
- 732 11. M. D. Johnson *et al.*, The Genetic Diversity of *Mesodinium* and Associated Cryptophytes.  
733 *Front. Microbiol.* **7**, 2017 (2016).
- 734 12. T. Lindholm, P. Lindroos, A. C. Mork, Ultrastructure of the photosynthetic ciliate *Mesodinium*  
735 *rubrum*. *BioSyst.* **21**, 141-149 (1988).
- 736 13. E. C. Nowack, M. Melkonian, Endosymbiotic associations within protists. *Phil. Trans. R. Soc. B*  
737 **365**, 699-712 (2010).
- 738 14. M. D. Johnson, D. Oldach, C. F. Delwiche, D. K. Stoecker, Retention of transcriptionally active  
739 cryptophyte nuclei by the ciliate *Myrionecta rubra*. *Nature* **445**, 426-428 (2007).
- 740 15. P. J. Hansen, M. Moldrup, W. Tarangkoon, L. Garcia-Cuetos, O. Moestrup, Direct evidence for  
741 symbiont sequestration in the marine red tide ciliate *Mesodinium rubrum*. *Aquat. Microb.*  
742 *Ecol.* **66**, 63-75 (2012).
- 743 16. M. Kim, K. Drumm, N. Daugbjerg, P. J. Hansen, Dynamics of Sequestered Cryptophyte Nuclei  
744 in *Mesodinium rubrum* during Starvation and Refeeding. *Front. Microbiol.* **8**, 1-14 (2017).
- 745 17. S. W. Nam, J. W. Park, W. Yih, M. G. Park, W. Shin, The fate of cryptophyte cell organelles in  
746 the ciliate *Mesodinium cf. rubrum* subjected to starvation. *Harmful Algae* **59**, 19-30 (2016).
- 747 18. P. Juel Hansen, T. Fenchel, The bloom-forming ciliate *Mesodinium rubrum* harbours a single  
748 permanent endosymbiont. *Mar. Biol. Res.* **2**, 169-177 (2006).
- 749 19. M. Smith, P. J. Hansen, Interaction between *Mesodinium rubrum* and its prey: importance of  
750 prey concentration, irradiance and pH. *Mar. Ecol. Prog. Ser.* **338**, 61-70 (2007).
- 751 20. D. J. Matthew, K. S. Diane, Role of feeding in growth and photophysiology of *Myrionecta*  
752 *rubra*. *Aquat. Microb. Ecol.* **39**, 303-312 (2005).
- 753 21. T. Fenchel, P. J. Hansen, Motile behaviour of the bloom-forming ciliate *Mesodinium rubrum*.  
754 *Mar. Biol. Res.* **2**, 33-40 (2006).
- 755 22. D. E. Gustafson, D. K. Stoecker, M. D. Johnson, W. F. Van Heukelem, K. Sneider, Cryptophyte  
756 algae are robbed of their organelles by the marine ciliate *Mesodinium rubrum*. *Nature* **405**,  
757 1049-1052 (2000).
- 758 23. E. Peltomaa, M. Johnson, *Mesodinium rubrum* exhibits genus-level but not species-level  
759 cryptophyte prey selection. *Aquat. Microb. Ecol.* **78**, 147-159 (2017).
- 760 24. G. H. Kim *et al.*, Cryptophyte gene regulation in the kleptoplastidic, karyokleptic ciliate  
761 *Mesodinium rubrum*. *Harmful Algae* **52**, 23-33 (2016).
- 762 25. E. Lasek-Nesselquist, J. H. Wisecaver, J. D. Hackett, M. D. Johnson, Insights into  
763 transcriptional changes that accompany organelle sequestration from the stolen nucleus of  
764 *Mesodinium rubrum*. *BMC Genomics* **16**, 805 (2015).
- 765 26. J. F. Allen, W. B. M. de Paula, S. Puthiyaveetil, J. Nield, A structural phylogenetic map for  
766 chloroplast photosynthesis. *Trends Plant Sci.* **16**, 645-655 (2011).
- 767 27. H. Qiu, M. Lee Jun, S. Yoon Hwan, D. Bhattacharya, Hypothesis: Gene-rich plastid genomes in  
768 red algae may be an outcome of nuclear genome reduction. *J. Phycol.* **53**, 715-719 (2017).
- 769 28. D. Grzebyk, O. Schofield, C. Vetriani, P. G. Falkowski, The Mesozoic Radiation of Eukaryotic  
770 Algae: The Portable Plastid Hypothesis. *J. Phycol.* **39**, 259-267 (2003).
- 771 29. E. Hehenberger, R. J. Gast, P. J. Keeling, A kleptoplastidic dinoflagellate and the tipping point  
772 between transient and fully integrated plastid endosymbiosis. *Proc. Natl. Acad. Sci. U.S.A.*  
773 10.1073/pnas.1910121116, 1-9 (2019).

- 774 30. G. I. McFadden, Origin and evolution of plastids and photosynthesis in eukaryotes. *Cold*  
775 *Spring Harb. Perspect. Biol.* **6**, a016105 (2014).
- 776 31. M. G. Park, M. Kim, S. Kim, The Acquisition of Plastids/Phototrophy in Heterotrophic  
777 Dinoflagellates. *Acta Protozool.* **53**, 39-50 (2014).
- 778 32. M. D. Johnson, D. J. Beaudoin, The genetic diversity of plastids associated with mixotrophic  
779 oligotrich ciliates. *Limnol. Oceanogr.* **64**, 2187-2201 (2019).
- 780 33. M. Kim, S. Kim, W. Yih, M. G. Park, The marine dinoflagellate genus *Dinophysis* can retain  
781 plastids of multiple algal origins at the same time. *Harmful Algae* **13**, 105-111 (2012).
- 782 34. A. B. Tourancheau, N. Tsao, L. A. Klobutcher, R. E. Pearlman, A. Adoutte, Genetic code  
783 deviations in the ciliates: evidence for multiple and independent events. *EMBO J.* **14**, 3262-  
784 3267 (1995).
- 785 35. S. M. Heaphy, M. Mariotti, V. N. Gladyshev, J. F. Atkins, P. V. Baranov, Novel Ciliate Genetic  
786 Code Variants Including the Reassignment of All Three Stop Codons to Sense Codons in  
787 *Condylostoma magnum*. *Mol. Biol. Evol.* **33**, 2885-2889 (2016).
- 788 36. M. D. Johnson, D. J. Beaudoin, M. J. Frada, E. F. Brownlee, D. K. Stoecker, High grazing rates  
789 on cryptophyte algae in Chesapeake Bay. *Front. Mar. Sci.* **5**, 1-13 (2018).
- 790 37. Y. Chen *et al.*, SOAPnuke: a MapReduce acceleration-supported software for integrated  
791 quality control and preprocessing of high-throughput sequencing data. *Gigascience* **7**, 1-6  
792 (2018).
- 793 38. M. G. Grabherr *et al.*, Full-length transcriptome assembly from RNA-Seq data without a  
794 reference genome. *Nat. Biotechnol.* **29**, 644-652 (2011).
- 795 39. B. J. Haas *et al.*, De novo transcript sequence reconstruction from RNA-seq using the Trinity  
796 platform for reference generation and analysis. *Nat. Protoc.* **8**, 1494-1512 (2013).
- 797 40. L. Fu, B. Niu, Z. Zhu, S. Wu, W. Li, CD-HIT: accelerated for clustering the next-generation  
798 sequencing data. *Bioinformatics* **28**, 3150-3152 (2012).
- 799 41. W. Li, A. Godzik, Cd-hit: a fast program for clustering and comparing large sets of protein or  
800 nucleotide sequences. *Bioinformatics* **22**, 1658-1659 (2006).
- 801 42. R. Patro, G. Duggal, M. I. Love, R. A. Irizarry, C. Kingsford, Salmon provides fast and bias-  
802 aware quantification of transcript expression. *Nat. Methods* **14**, 417-419 (2017).
- 803 43. B. D. Ondov *et al.*, Mash: fast genome and metagenome distance estimation using MinHash.  
804 *Genome Biol.* **17**, 132 (2016).
- 805 44. B. D. Ondov *et al.*, Mash Screen: high-throughput sequence containment estimation for  
806 genome discovery. *Genome Biol.* **20**, 232 (2019).
- 807 45. H. Li, Minimap2: pairwise alignment for nucleotide sequences. *Bioinformatics* **34**, 3094-3100  
808 (2018).
- 809 46. A. J. Enright, S. Van Dongen, C. A. Ouzounis, An efficient algorithm for large-scale detection  
810 of protein families. *Nucleic Acids Res.* **30**, 1575-1584 (2002).
- 811 47. H. Li, R. Durbin, Fast and accurate short read alignment with Burrows-Wheeler transform.  
812 *Bioinformatics* **25**, 1754-1760 (2009).
- 813 48. H. Li *et al.*, The Sequence Alignment/Map format and SAMtools. *Bioinformatics* **25**, 2078-  
814 2079 (2009).
- 815 49. H. Li, A statistical framework for SNP calling, mutation discovery, association mapping and  
816 population genetical parameter estimation from sequencing data. *Bioinformatics* **27**, 2987-  
817 2993 (2011).
- 818 50. F. A. Simao, R. M. Waterhouse, P. Ioannidis, E. V. Kriventseva, E. M. Zdobnov, BUSCO:  
819 assessing genome assembly and annotation completeness with single-copy orthologs.  
820 *Bioinformatics* **31**, 3210-3212 (2015).
- 821 51. A. R. Quinlan, I. M. Hall, BEDTools: a flexible suite of utilities for comparing genomic features.  
822 *Bioinformatics* **26**, 841-842 (2010).
- 823 52. M. I. Love, W. Huber, S. Anders, Moderated estimation of fold change and dispersion for  
824 RNA-seq data with DESeq2. *Genome Biol.* **15**, 550 (2014).

- 825 53. P. Langfelder, S. Horvath, WGCNA: an R package for weighted correlation network analysis.  
826 *BMC Bioinformatics* **9**, 559 (2008).
- 827 54. M. Kanehisa, S. Goto, KEGG: kyoto encyclopedia of genes and genomes. *Nucleic Acids Res.*  
828 **28**, 27-30 (2000).
- 829 55. E. I. Boyle *et al.*, GO::TermFinder--open source software for accessing Gene Ontology  
830 information and finding significantly enriched Gene Ontology terms associated with a list of  
831 genes. *Bioinformatics* **20**, 3710-3715 (2004).
- 832 56. Y. Benjamini, Y. Hochberg, Controlling the False Discovery Rate: A Practical and Powerful  
833 Approach to Multiple Testing. *J. Roy. Stat. Soc. Ser. B. (Stat. Method.)* **57**, 289-300 (1995).
- 834 57. D. Merico, R. Isserlin, O. Stueker, A. Emili, G. D. Bader, Enrichment Map: A Network-Based  
835 Method for Gene-Set Enrichment Visualization and Interpretation. *PLOS ONE* **5**, e13984  
836 (2010).
- 837 58. P. Shannon *et al.*, Cytoscape: A Software Environment for Integrated Models of Biomolecular  
838 Interaction Networks. *Genome Res.* **13**, 2498-2504 (2003).
- 839 59. W. Luo, C. Brouwer, Pathview: an R/Bioconductor package for pathway-based data  
840 integration and visualization. *Bioinformatics* **29**, 1830-1831 (2013).

841
